# Supplementary material for: Nitrogen-doped graphene quantum dots coated with molecularly imprinted polymers as a fluorescent sensor for selective determination of warfarin
Source: Royal Society of Chemistry journal article supplement (doi:10.1039/d2nj00853j), 2022-01-01
Supplement: d2nj00853j6.pdf [file d2nj00853j6.pdf]

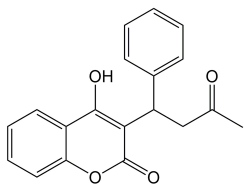

Warfarin

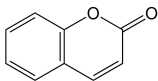

Coumarin

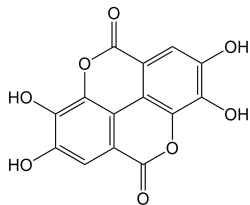

Ellagic acid

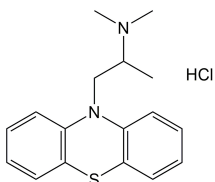

Promethazine hydrochloride

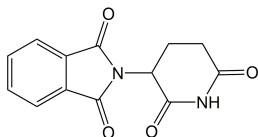

Thalidomide

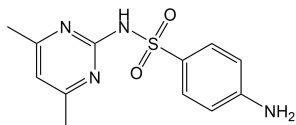

Sulfamethazine

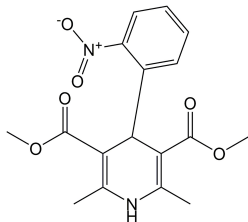

Nifedipine

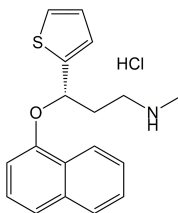

Duloxetine hydrochloride

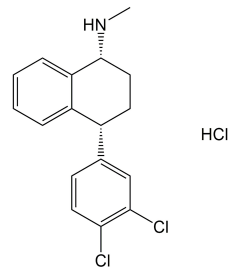

Sertraline hydrochloride

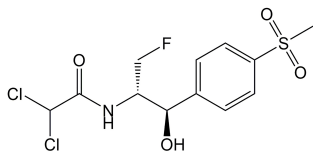

Florfenicol
