# Supplementary figures and images for: Nitrogen-doped graphene quantum dots coated with molecularly imprinted polymers as a fluorescent sensor for selective determination of warfarin
Source: Royal Society of Chemistry journal article supplement (doi:10.1039/d2nj00853j), 2022-01-01

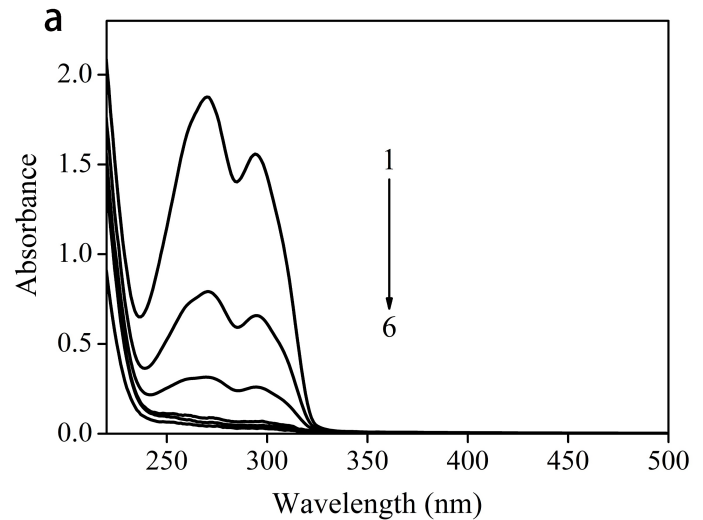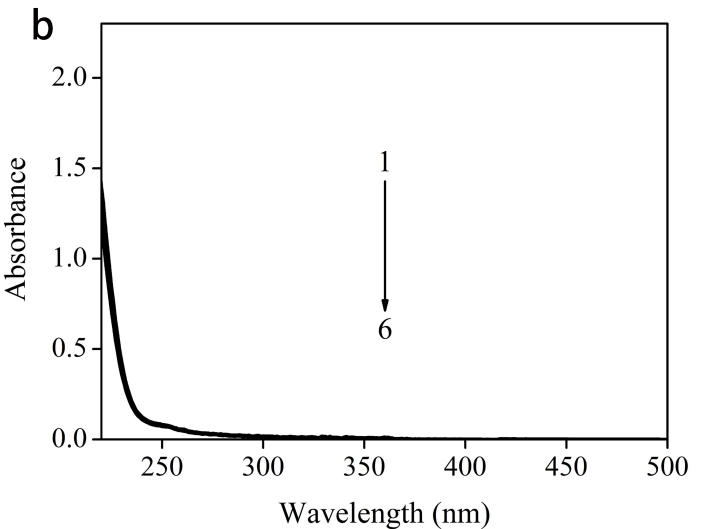

Supplement: d2nj00853j2.pdf [file d2nj00853j2.pdf]

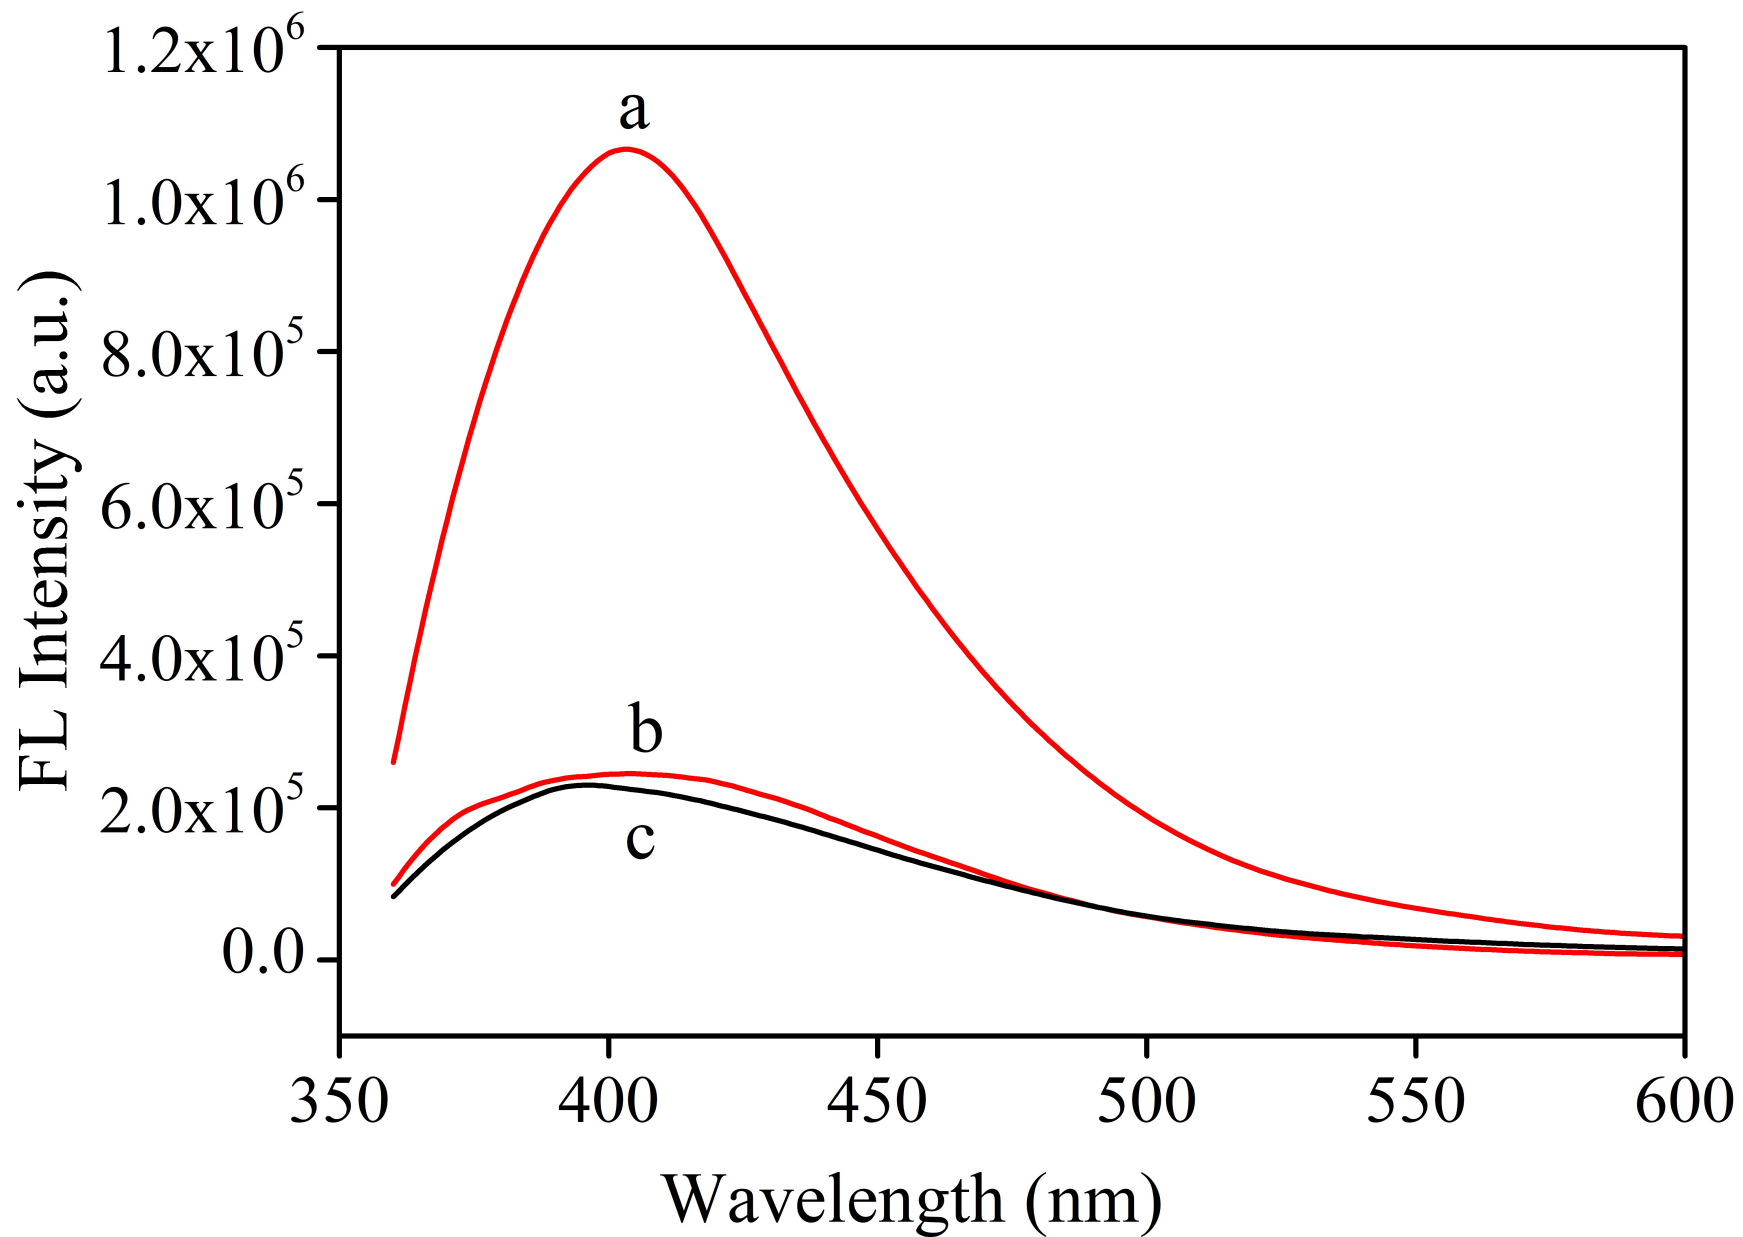

Supplement: d2nj00853j3.pdf [file d2nj00853j3.pdf]

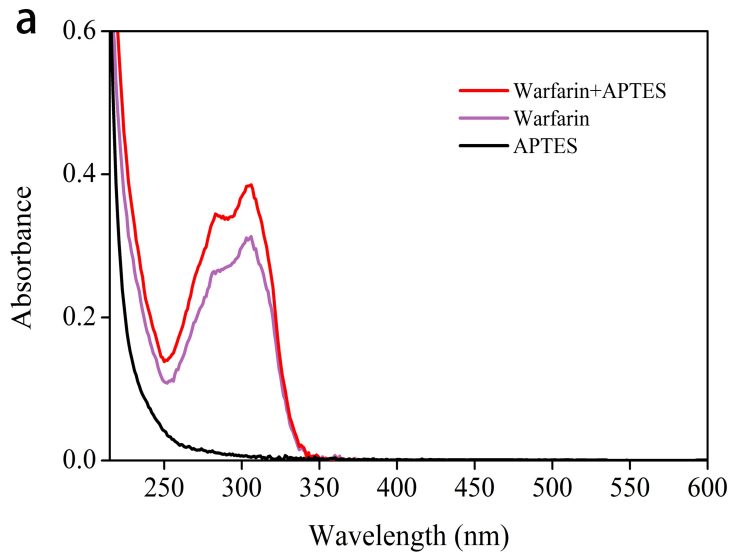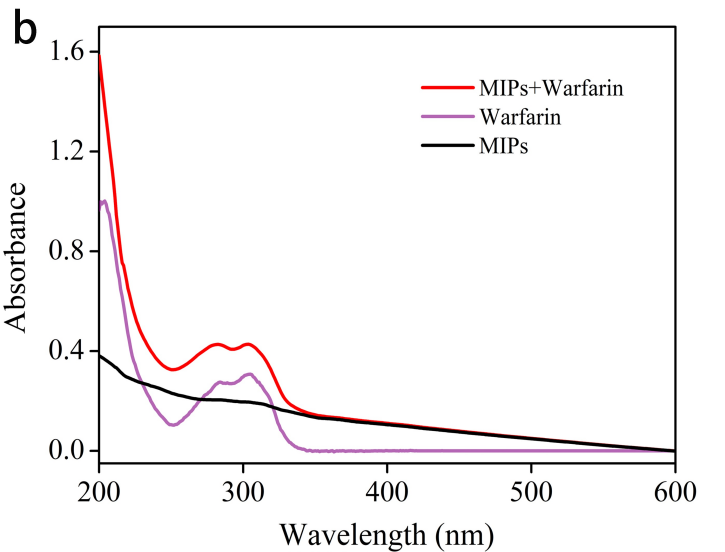

Supplement: d2nj00853j4.pdf [file d2nj00853j4.pdf]

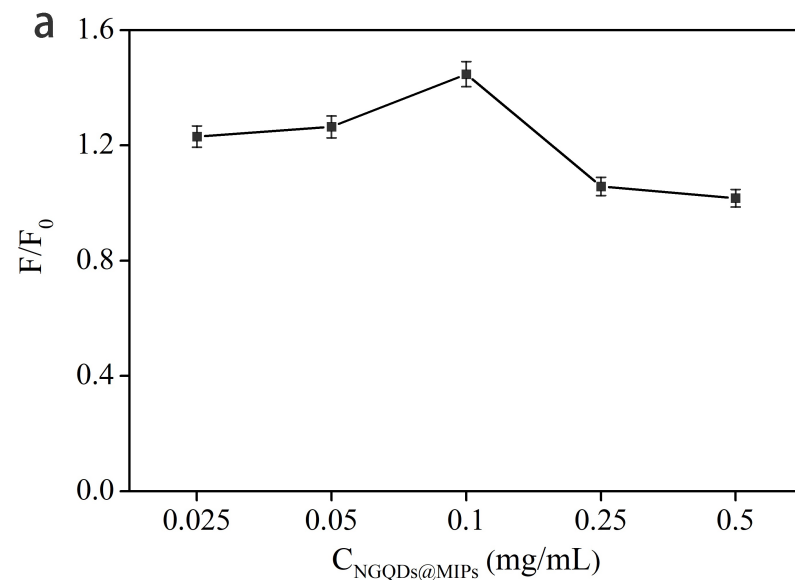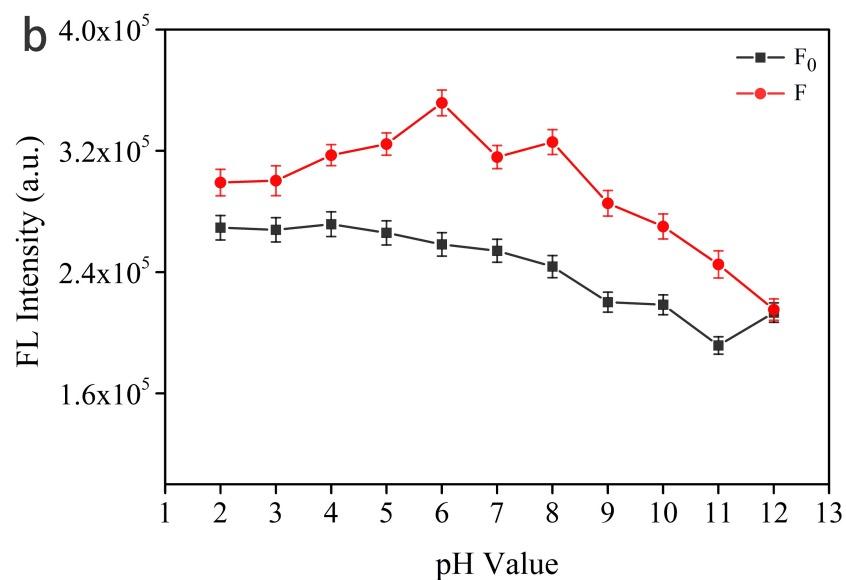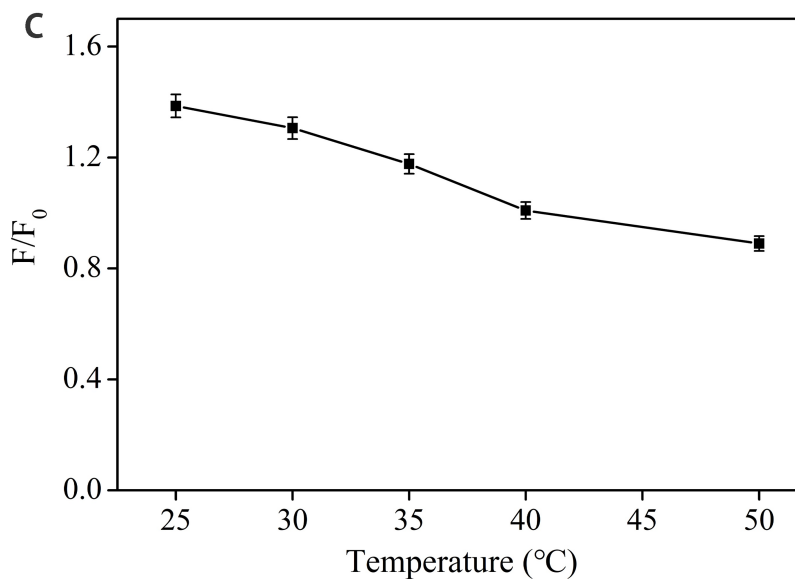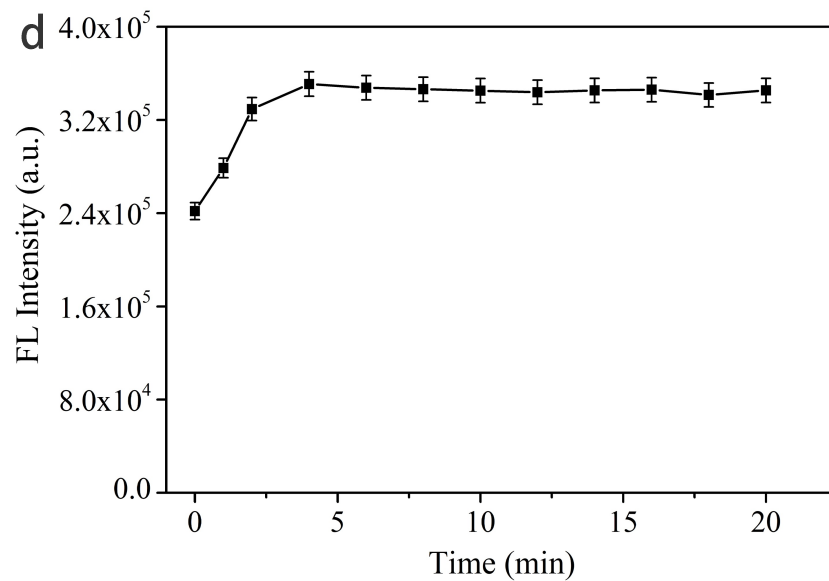

Supplement: d2nj00853j5.pdf [file d2nj00853j5.pdf]
